# Supplementary material
Source: publisher figshare collection journal article supplement (https://acs.figshare.com/ndownloader/files/4682176)
Supplement: Supplementary file 1 [file 4682176]

# Supporting Information

## **Absolute Structure of Prunustatin A, a Novel GRP78 Molecular Chaperone Down-Regulator**

Yukiko Umeda,<sup>1</sup> Kazuo Furihata,<sup>1</sup> Shohei Sakuda,<sup>1</sup> Hiromichi Nagasawa,<sup>1</sup> Ken Ishigami,<sup>1</sup> Hidenori Watanabe,<sup>1</sup> Yoichi Nakao<sup>2</sup> and Kazuo Shin-ya<sup>3</sup>

*<sup>1</sup>Graduate School of Agricultural and Life Sciences, The University of Tokyo, Bunkyo-ku, Tokyo 113-8657, Japan, <sup>2</sup>School of Advanced Science and Engineering, Waseda University, Shinjuku-ku, Tokyo 169-8555, Tokyo, Japan, <sup>3</sup>Biological Information Research Center, National Institute of Advanced Industrial Science and Technology, Koto-ku, Tokyo 135-0064, Japan.*

## General Techniques

NMR spectra were recorded on Varian 500 MHz instrument in  $\text{CDCl}_3$ . Chemical shifts are reported in ppm relative to chloroform (7.25 ppm for  $^1\text{H}$ ) or chloroform-*d* (77.0 ppm for  $^{13}\text{C}$ ). Multiplicities are reported by using the following abbreviations: s; singlet, d; doublet, t; triplet, q; quartet, m; multiplet, *J*; coupling constants in Hertz.

S1  $^1\text{H}$  NMR spectrum of prunustatin A (1)

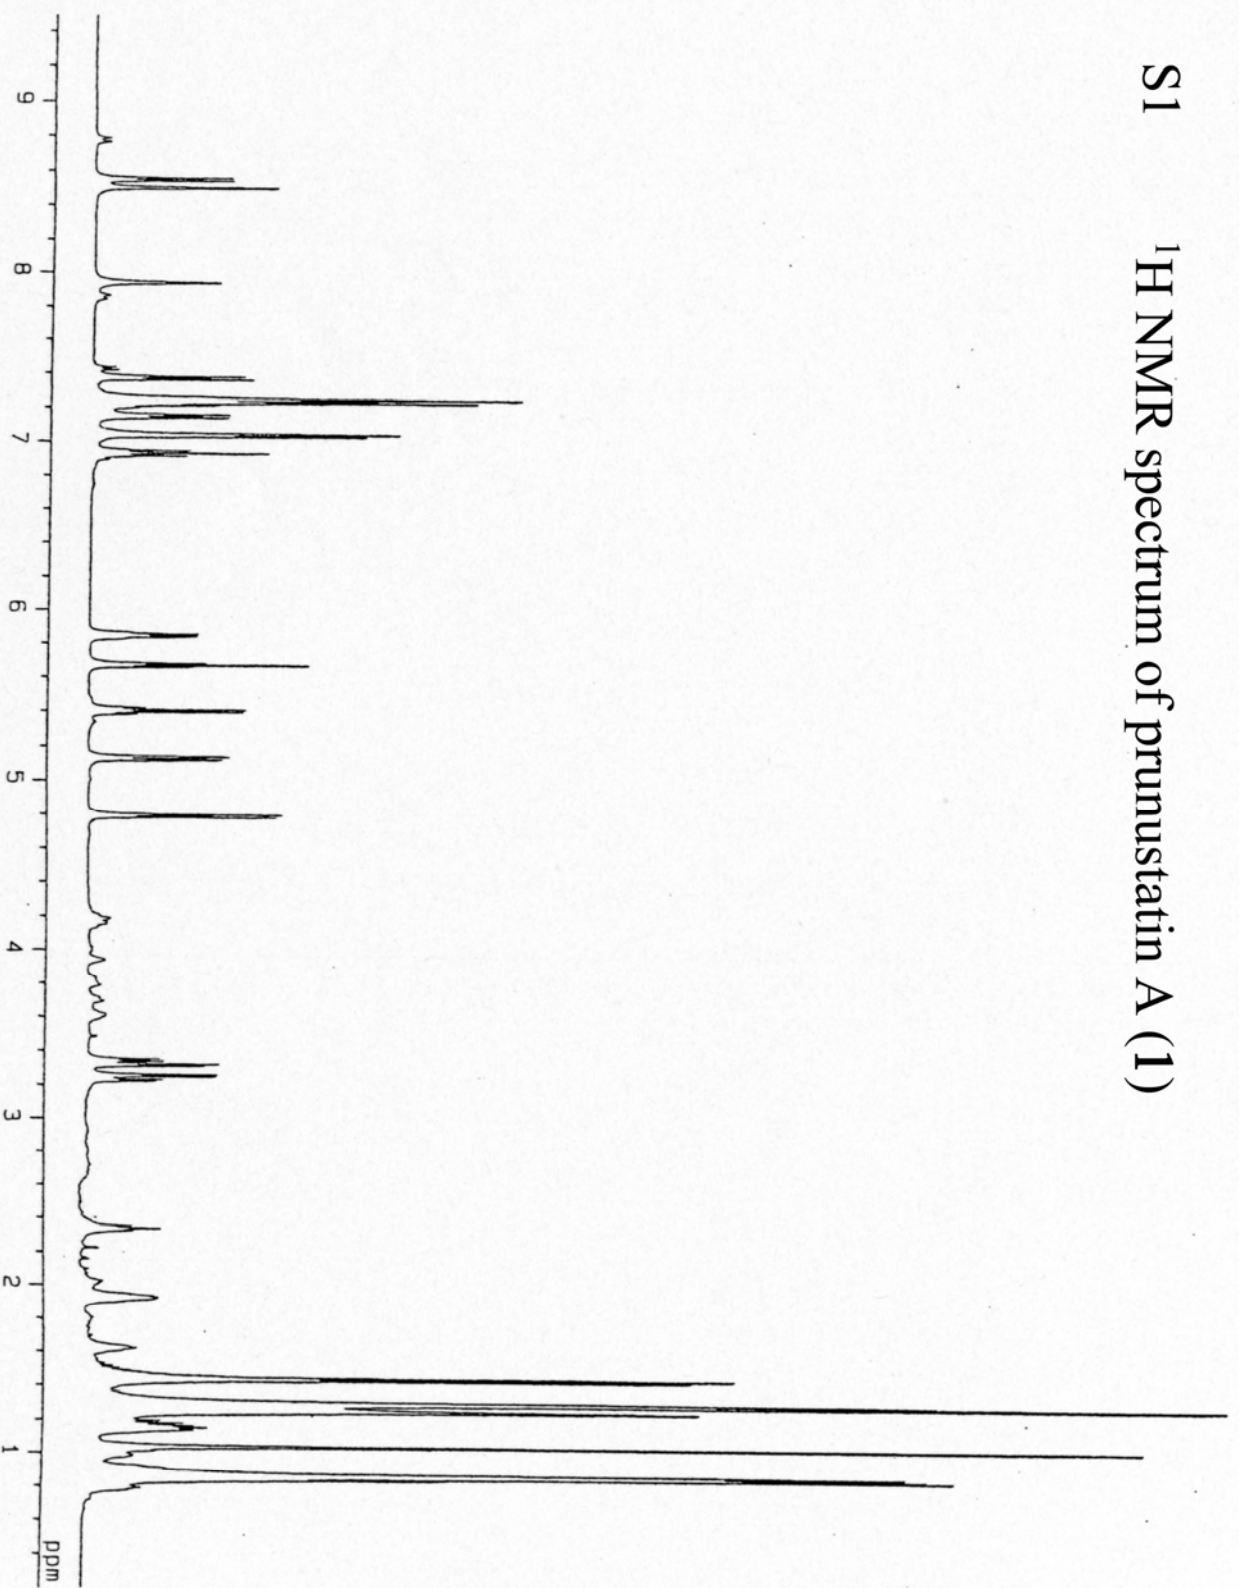

S2

$^1\text{H}$  NMR spectrum of SW-163A (2)

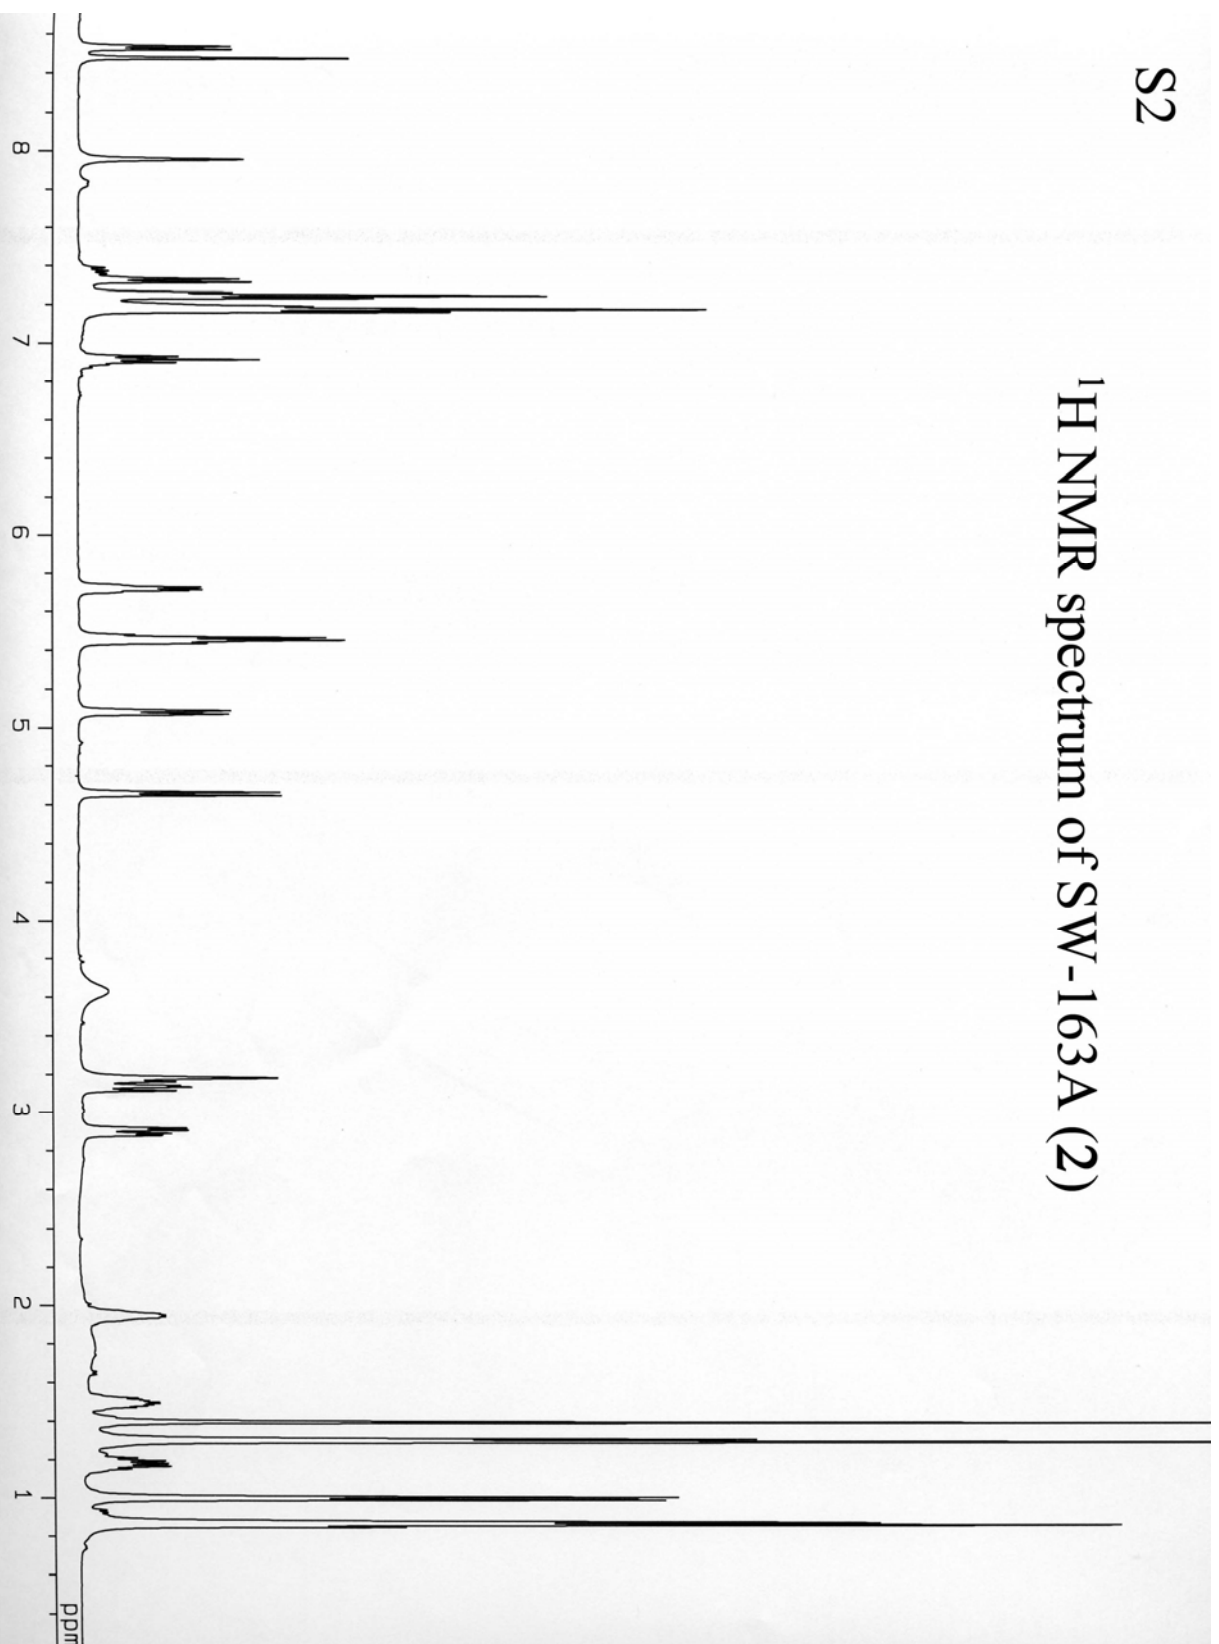

S3

$^1\text{H}$  NMR spectrum of  
Oxidized SW 163-A by DMP

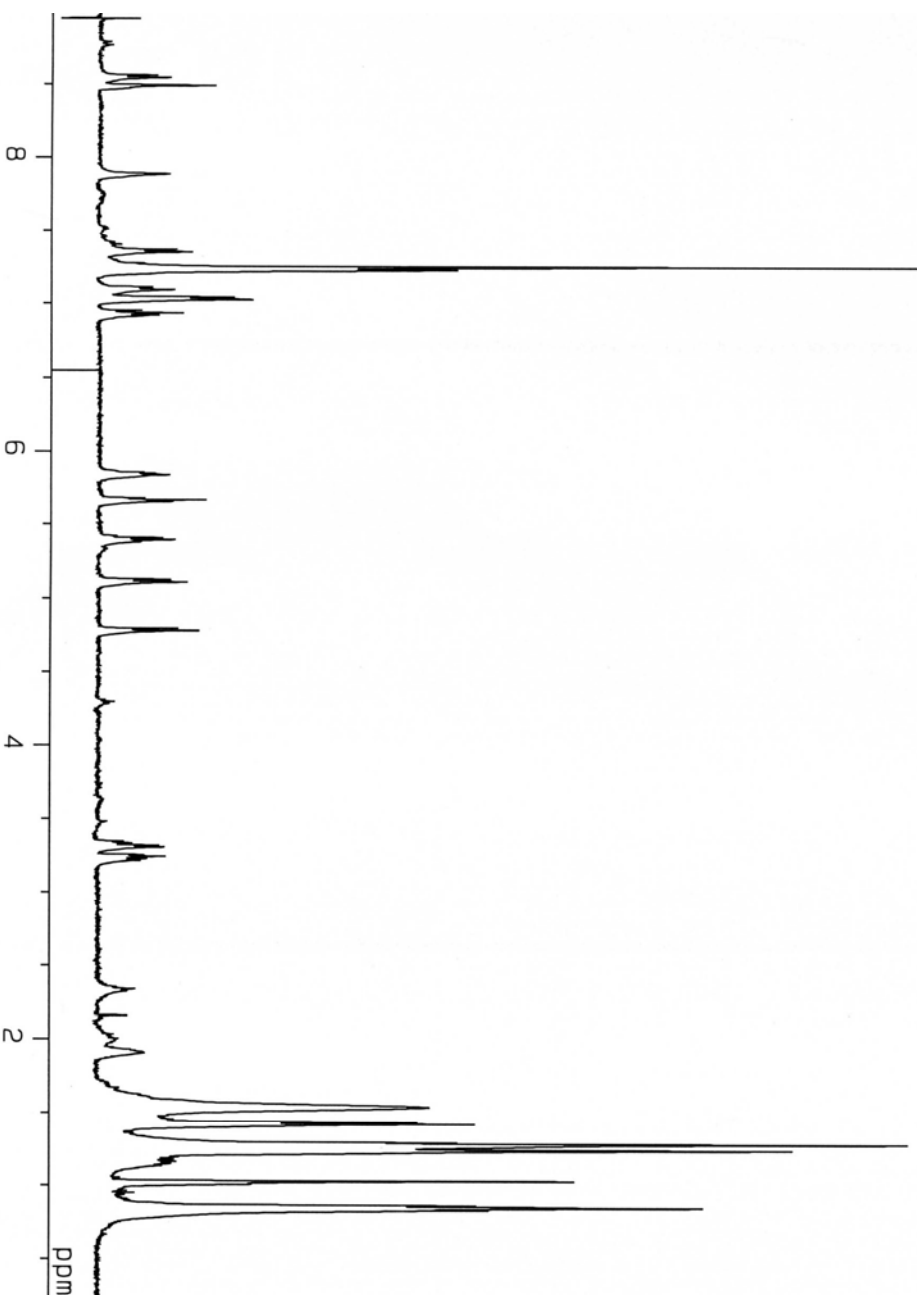

S4

$^1\text{H}$  NMR spectrum of Reduced prunustatin A by  $\text{NaBH}_4$

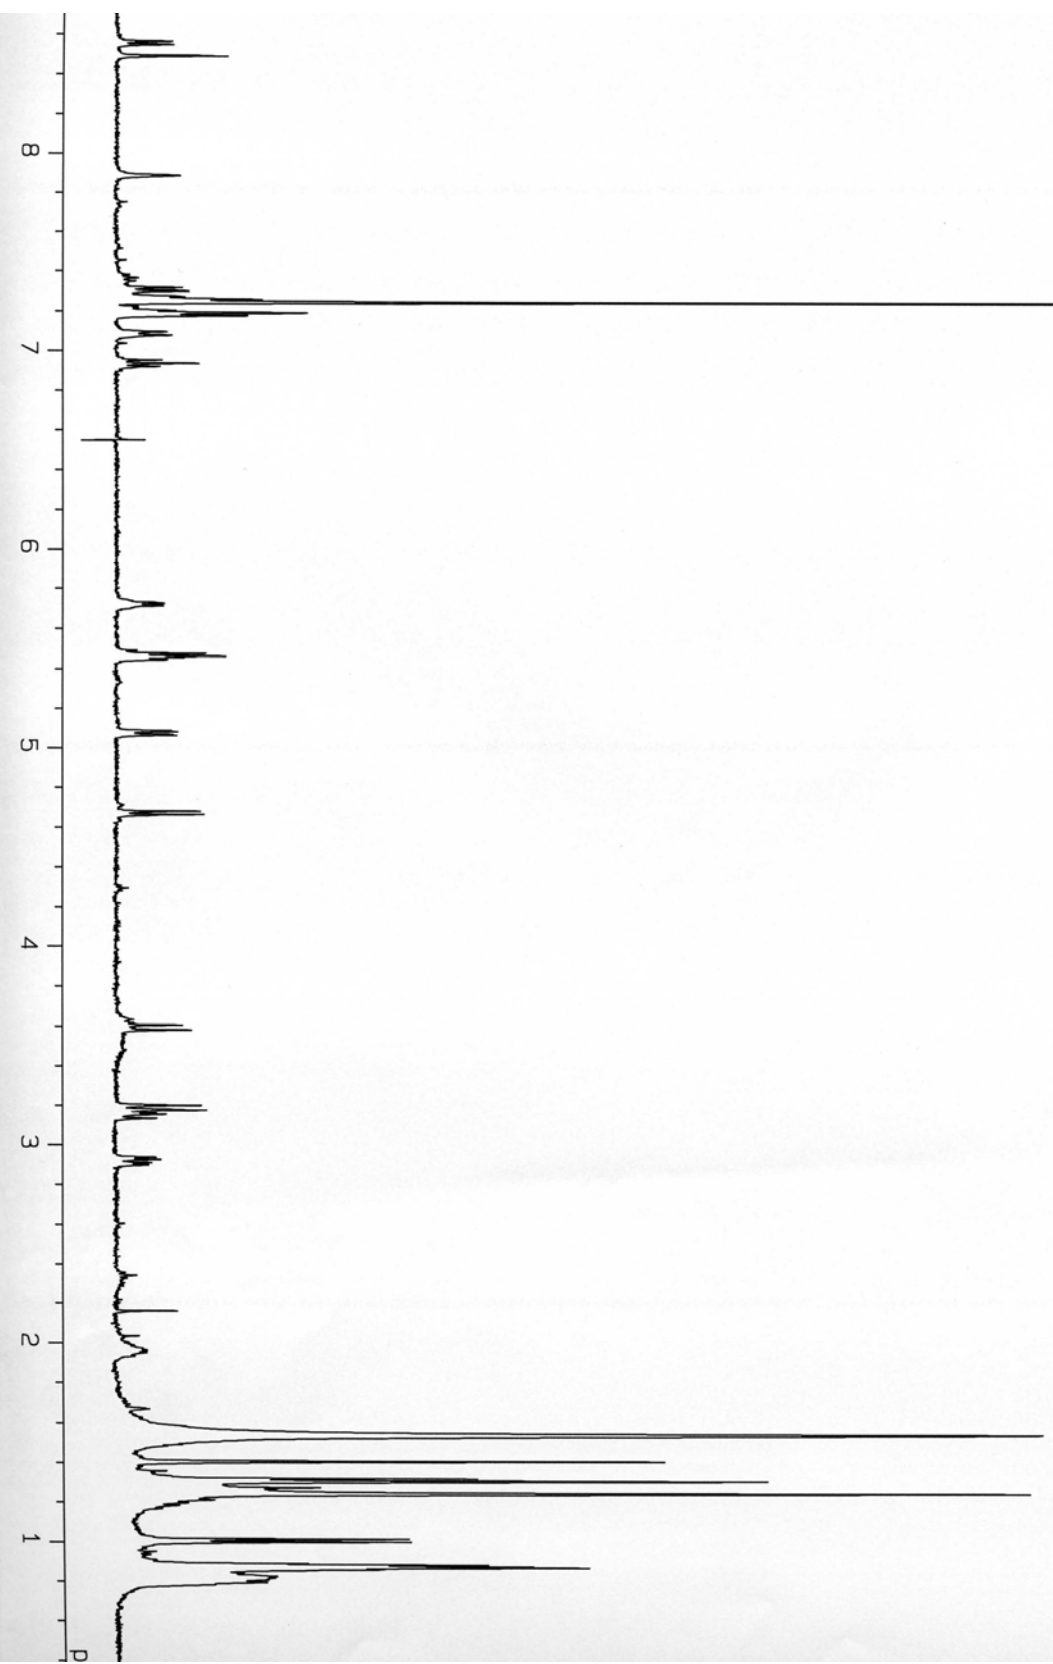

S5

$^1\text{H}$  NMR spectrum of S-MTPA ester of 5

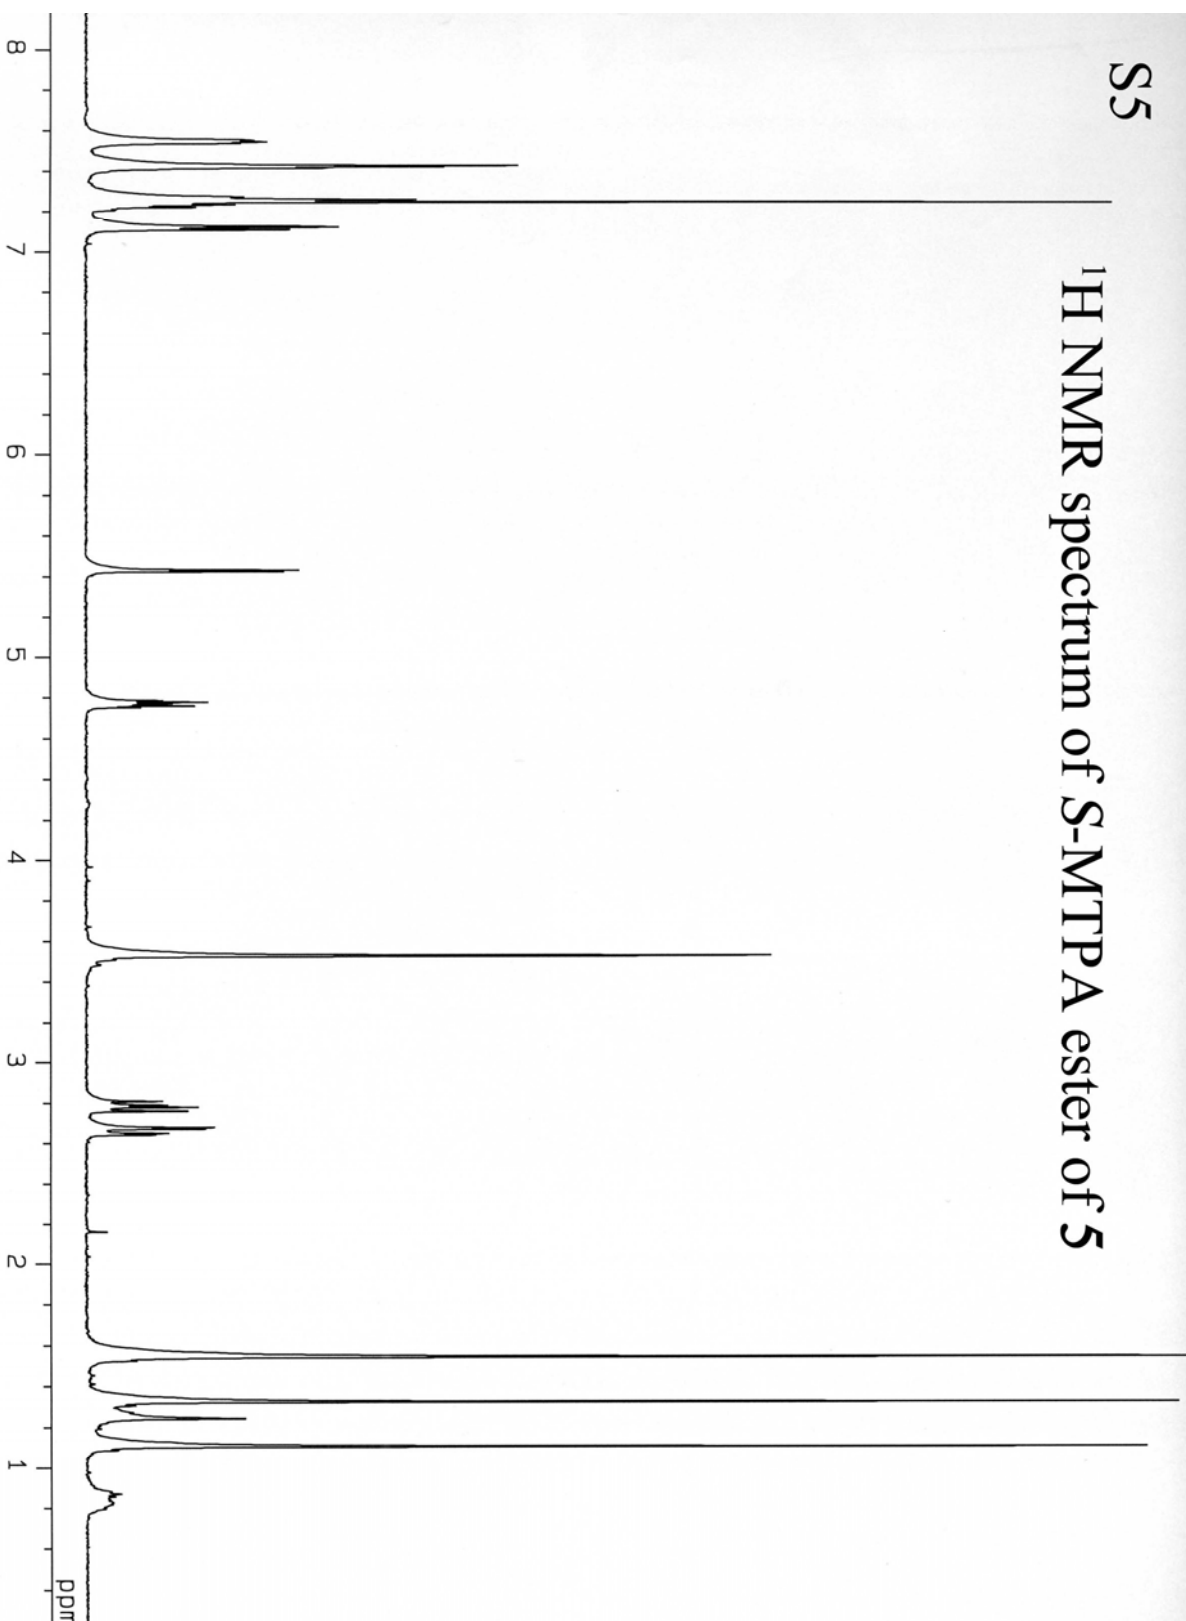

S6

<sup>1</sup>H NMR spectrum of *R*-MTPA ester of **5**

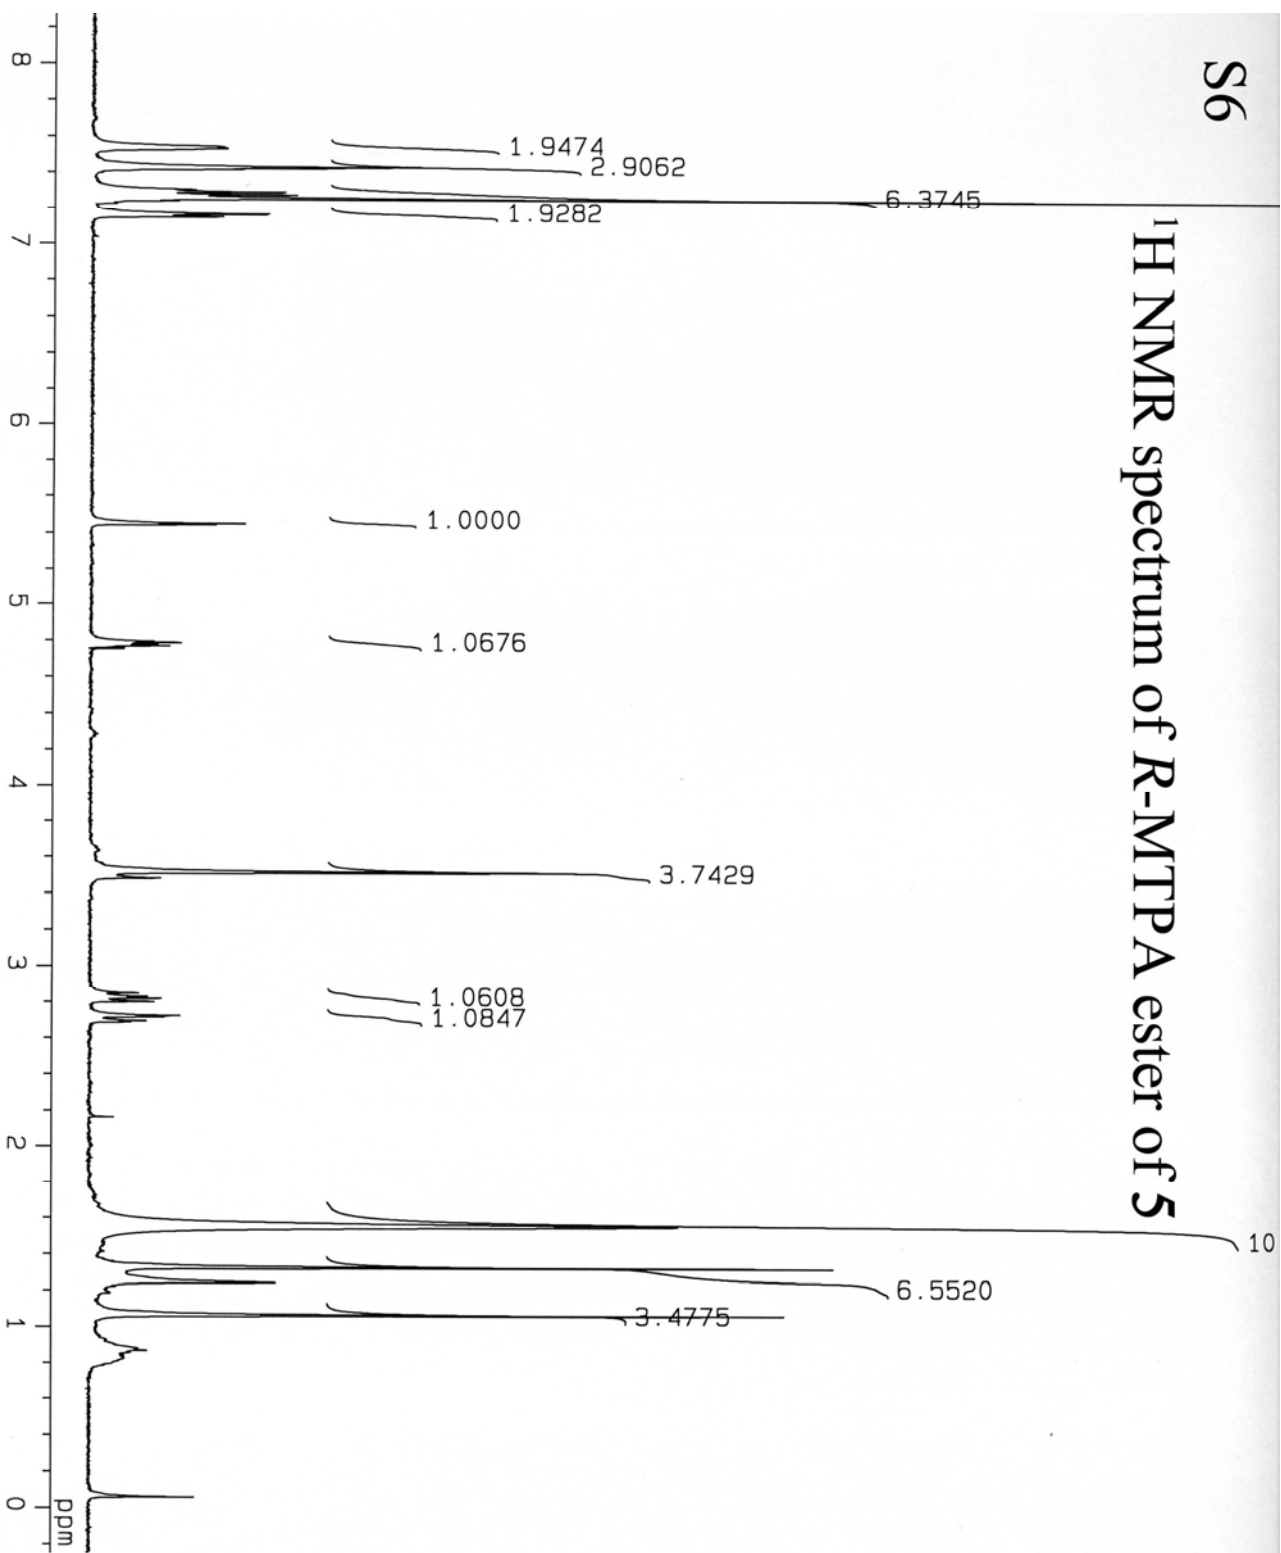



**S7**

gmbc-jreso  
Pulse Sequence: gmbc\_jreso

*J*-resolved HMBC spectrum of **1**

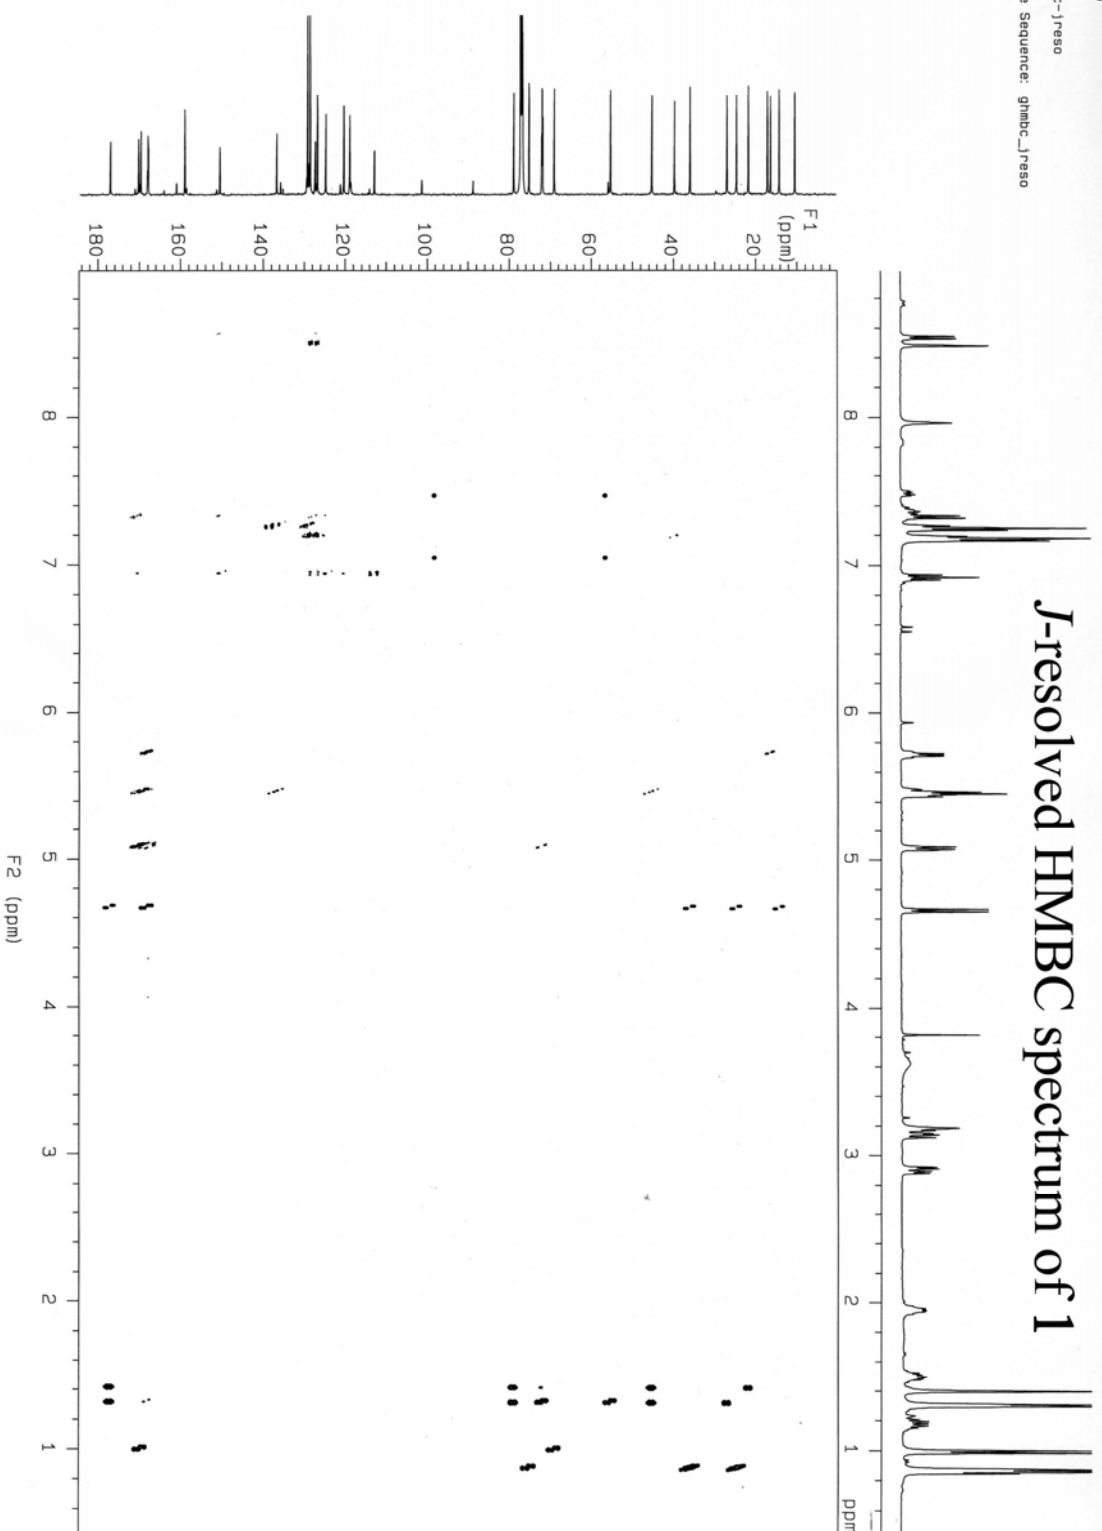

S8

STANDARD PROTON PARAMETERS  
Use Sequence: NOESY

# NOESY spectrum of 1

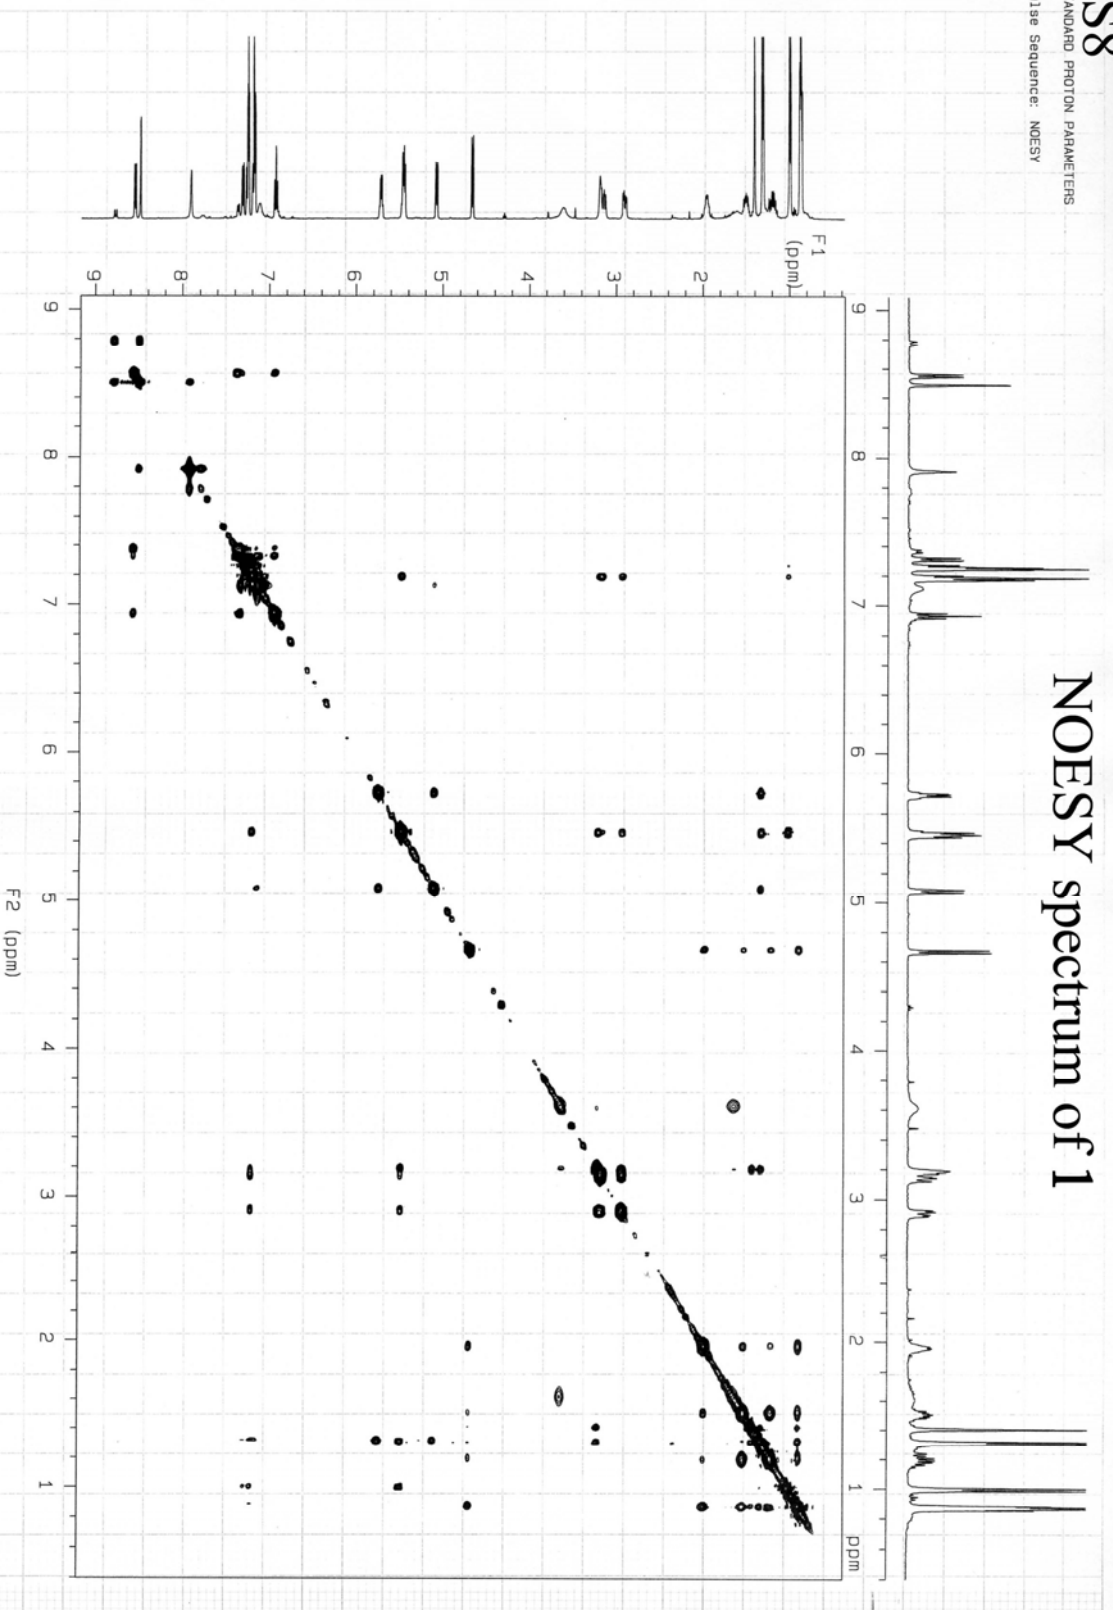

CHART 100-00-15

4000110400000000
